# Supplementary material for: Effect of Model Body Type and Print Angle on the Accuracy of 3D-Printed Orthodontic Models
Source: MDPI journal article supplement (doi:10.3390/biomimetics9040217), 2024-04-06
Supplement: s1 [file s1]

Table S1: Mean measurements of experimental models in mm (N=10 models per model type and print angle). Mean measurements were calculated from 30 measurements (three measurements per site on each of the 10 models per model type and print angle).

| <b>Model type</b>     | <b>Solid</b> |              |              | <b>Shell</b>  |              |              |
|-----------------------|--------------|--------------|--------------|---------------|--------------|--------------|
| <b>Print angle</b>    | <b>0°</b>    | <b>70°</b>   | <b>90°</b>   | <b>0°</b>     | <b>70°</b>   | <b>90°</b>   |
| Incisor Height        | -0.20 ± 0.03 | -0.09 ± 0.04 | -0.08 ± 0.06 | -0.23 ± 0.03  | -0.10 ± 0.04 | -0.08 ± 0.06 |
| Canine Height         | -0.25 ± 0.03 | -0.14 ± 0.05 | -0.14 ± 0.04 | -0.26 ± 0.03* | -0.19 ± 0.03 | -0.14 ± 0.04 |
| Premolar Height       | -0.20 ± 0.02 | -0.12 ± 0.03 | -0.14 ± 0.04 | -0.21 ± 0.03  | -0.14 ± 0.06 | -0.12 ± 0.04 |
| Molar Height          | -0.19 ± 0.02 | -0.01 ± 0.04 | -0.12 ± 0.05 | -0.19 ± 0.05  | -0.13 ± 0.05 | -0.10 ± 0.02 |
| Incisor Width         | -0.04 ± 0.05 | -0.01 ± 0.04 | -0.03 ± 0.06 | -0.03 ± 0.05  | -0.02 ± 0.05 | -0.09 ± 0.07 |
| Canine Width          | 0.04 ± 0.05  | 0.01 ± 0.04  | -0.02 ± 0.03 | 0.04 ± 0.04   | 0.01 ± 0.03  | -0.05 ± 0.03 |
| Premolar Width        | -0.02 ± 0.03 | -0.02 ± 0.04 | -0.02 ± 0.03 | -0.03 ± 0.04  | -0.04 ± 0.03 | -0.02 ± 0.03 |
| Molar Width           | 0.02 ± 0.04  | 0.01 ± 0.03  | 0.03 ± 0.01  | 0.01 ± 0.05   | -0.02 ± 0.02 | -0.01 ± 0.02 |
| Intermolar Distance   | -0.15 ± 0.25 | 0.10 ± 0.23  | 0.13 ± 0.25  | 0.09 ± 0.27   | 0.37 ± 0.17  | 0.12 ± 0.30  |
| Inter canine Distance | -0.04 ± 0.20 | -0.07 ± 0.19 | -0.07 ± 0.22 | 0.01 ± 0.24   | 0.07 ± 0.13  | -0.21 ± 0.25 |
| Arch Depth            | -0.18 ± 0.08 | -0.15 ± 0.05 | -0.17 ± 0.06 | -0.22 ± 0.12  | -0.21 ± 0.06 | -0.26 ± 0.04 |

\* Only one mean measurement fell outside the selected range of clinical acceptability
