# Supplementary material for: Effect of Model Body Type and Print Angle on the Accuracy of 3D-Printed Orthodontic Models
Source: Biomimetics (Basel). 2024 Apr 6;9(4):217. doi: 10.3390/biomimetics9040217 (PMC11048263; doi:10.3390/biomimetics9040217)
Supplement: Supplementary file 1 [file biomimetics-09-00217-s001.zip]

Archive with 6 entries (6 files):
- Figure S1.jpg
- Figure S2.png
- Figure S3.jpg
- supplementary materials captions.pdf
- Table S1.pdf
- Table S2.pdf
